# Supplementary material
Source: Springer Nature journal article supplement (https://www.springermedizin.de/resource/supplementary/13054_2012_657_MOESM3_ESM.pdf/9708952)

% potential lung donors with  
 $\text{PaO}_2 / \text{FiO}_2 > 300 \text{ mmHg}$  (%)

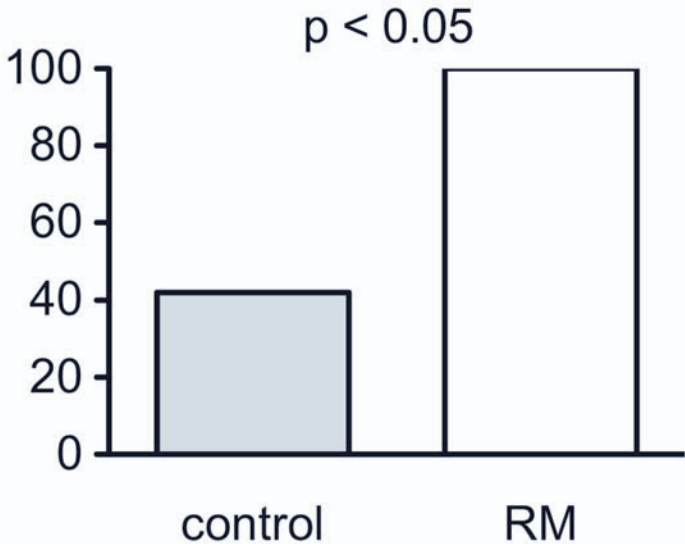

Supplement: MOESM3 [file 9708952]
